# Supplementary material for: Multifunctional quaternized carbon dots with enhanced biofilm penetration and eradication efficiencies
Source: Royal Society of Chemistry journal article supplement (doi:10.1039/c9tb00681h), 2019-01-01
Supplement: c9tb00681h1.pdf [file c9tb00681h1.pdf]

Electronic Supplementary Information (ESI)

**Multifunctional quaternized carbon dots with enhanced biofilm penetration  
and eradication efficiencies**

Huan-Huan Ran,<sup>†</sup> Xiaotong Cheng,<sup>†</sup> Yan-Wen Bao, Xian-Wu Hua, Ge Gao, Xiaodong Zhang,

Yao-Wen Jiang, Ya-Xuan Zhu and Fu-Gen Wu\*

*State Key Laboratory of Bioelectronics, School of Biological Science and Medical  
Engineering, Southeast University, 2 Sipailou Road, Nanjing 210096, P. R. China E-  
mail: wufg@seu.edu.cn*

<sup>†</sup>Huan-Huan Ran and Xiaotong Cheng contributed equally to this work.

## Additional figures

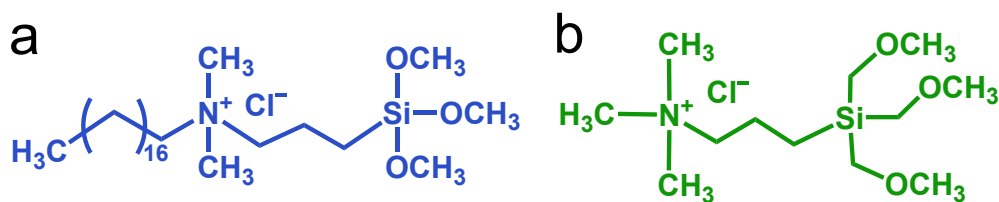

**Fig. S1** Molecular structures of Si-QAC (a) and TTPAC (b).

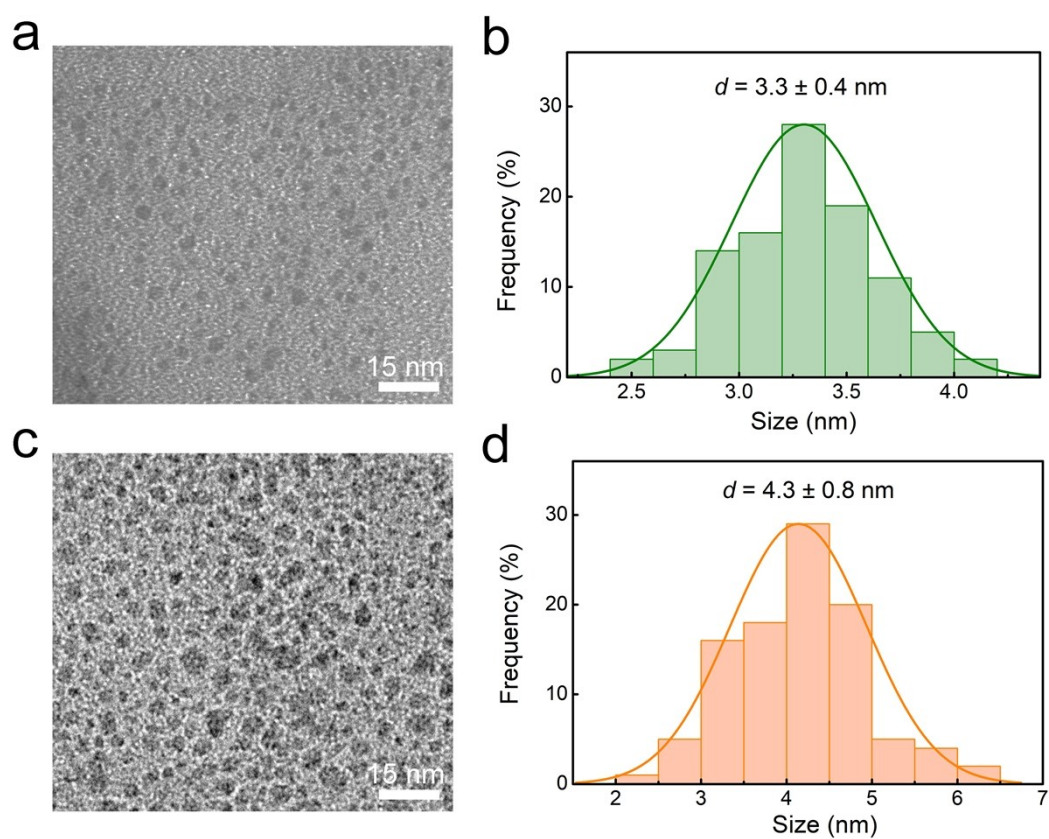

**Fig. S2** (a) TEM image and (b) corresponding size distribution histogram of Si-QAC CDs. (c) TEM image and (d) corresponding size distribution histogram of TTPAC CDs.

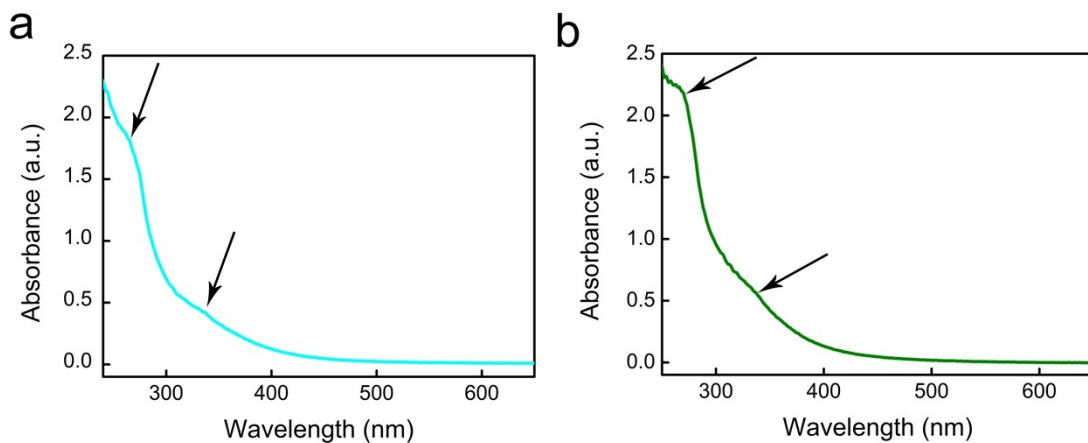

**Fig. S3** UV-vis absorption spectra of Si-QAC CDs (a) and TTPAC CDs (b) in water.

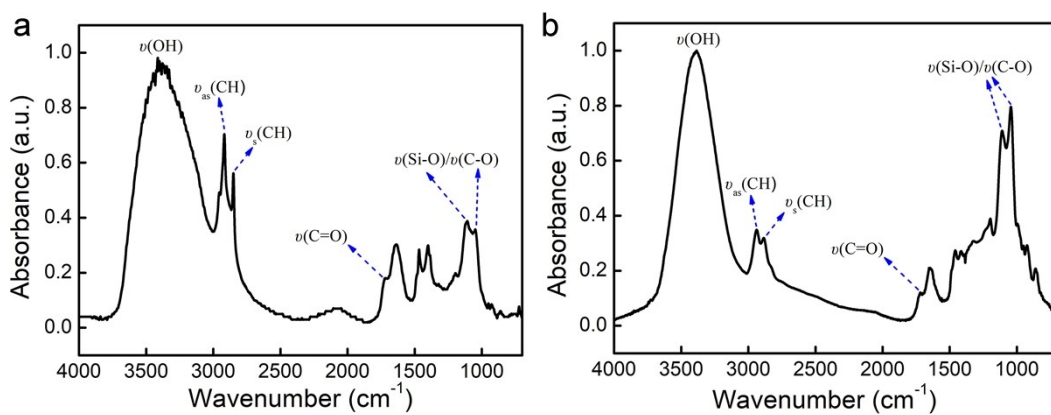

**Fig. S4** FTIR spectra of Si-QAC CD (a) and TTPAC CD (b) dry powders.

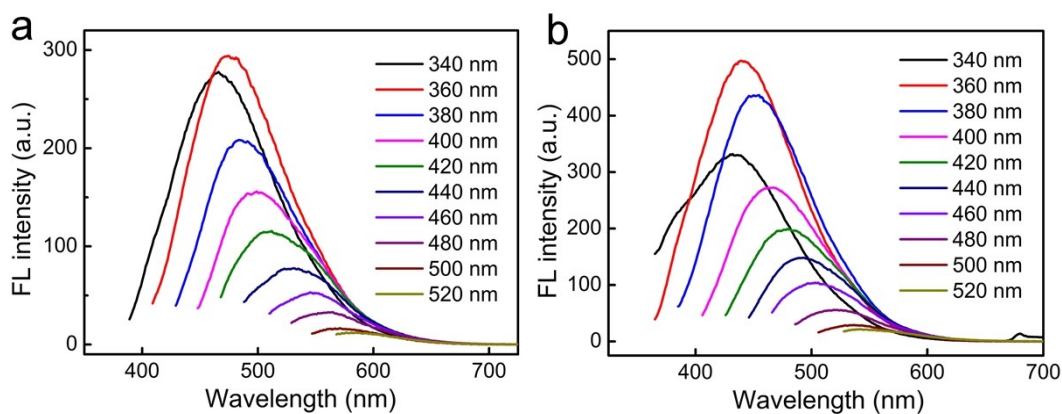

**Fig. S5** Fluorescence (FL) emission spectra of Si-QAC CDs (a) and TTPAC CDs (b) in water at different excitation wavelengths (340–520 nm).

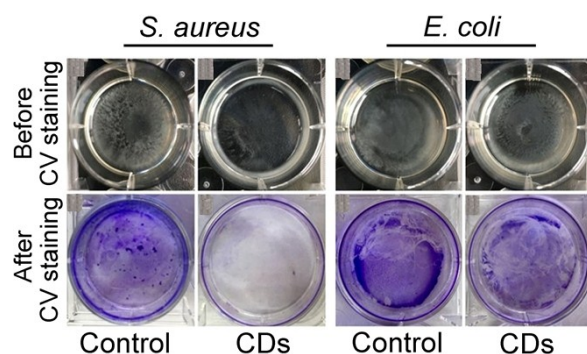

**Fig. S6** Photographs of the untreated (control) and Si-QAC CD ( $1000 \mu\text{g mL}^{-1}$ )-treated *S. aureus* and *E. coli* biofilms for 24 h before and after crystal violet (CV) staining.

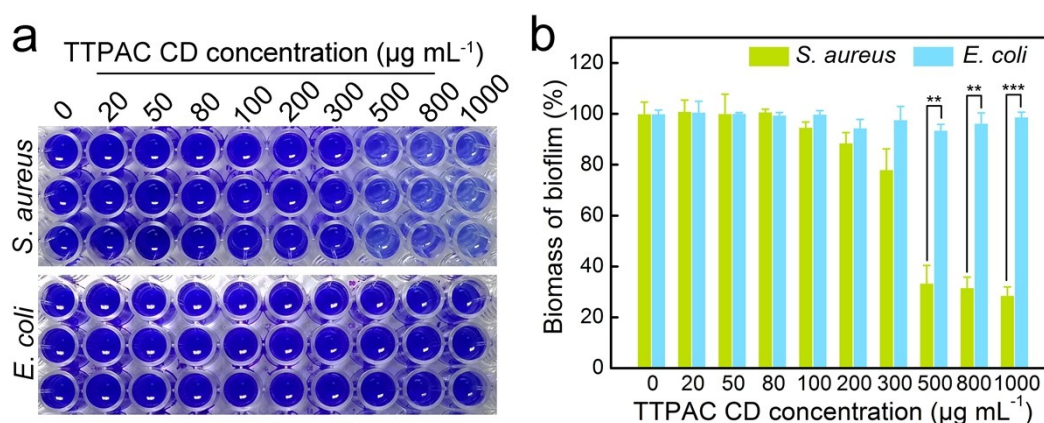

**Fig. S7** (a) Photographs of the CV staining assay results of *S. aureus* and *E. coli* bacterial biofilms after treatment with different concentrations of TTPAC CDs for 24 h. (b) Change of biofilm biomass as a function of TTPAC CD concentration. The biofilm biomass was quantified by the CV absorbance of the bacterial biofilms in (a). The biomass of the untreated biofilm was set to be 100%. \*\* $p < 0.01$ , \*\*\* $p < 0.001$ .

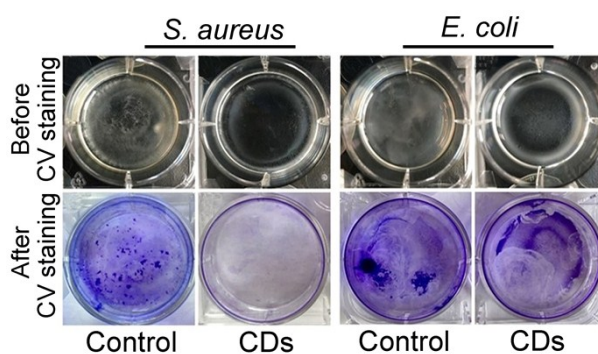

**Fig. S8** Photographs of the untreated (control) and Si-QAC CD (1000  $\mu\text{g mL}^{-1}$ )-treated *S. aureus* and *E. coli* bacteria for 72 h before and after CV staining.

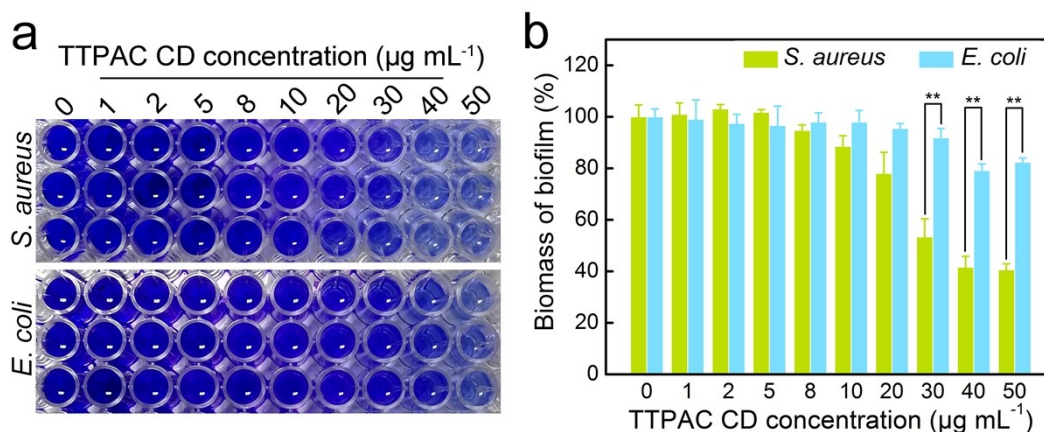

**Fig. S9** (a) Photographs of the CV staining assay results of *S. aureus* and *E. coli* bacteria after treatment with different concentrations of TTPAC CDs for 72 h. (b) Change of biofilm biomass as a function of TTPAC CD concentration. The biofilm biomass was quantified by the CV absorbance of the bacterial biofilms in (a). The biomass of the untreated biofilm was set to be 100%. \*\* $p < 0.01$ .

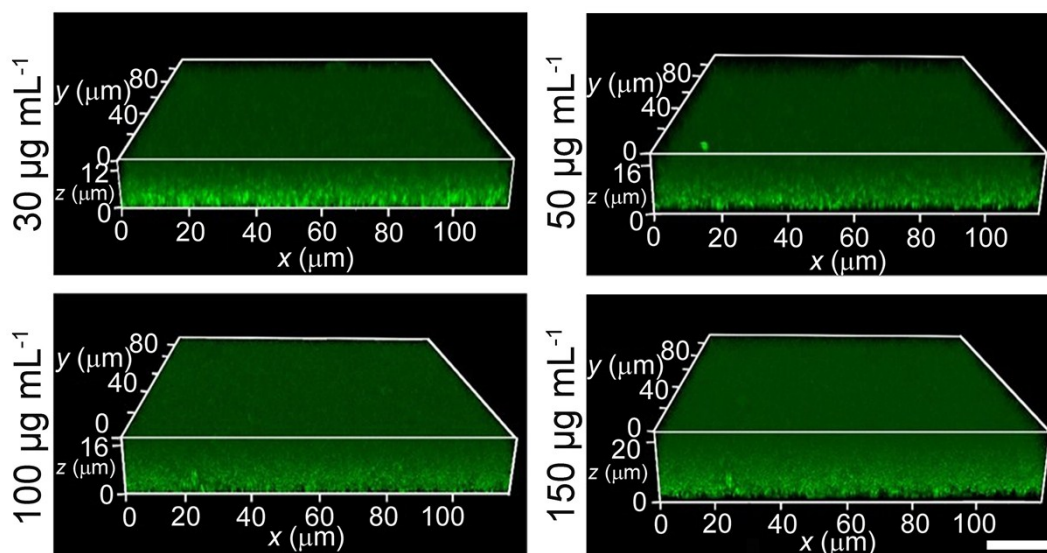

**Fig. S10** 3D confocal fluorescence images of *S. aureus* biofilms taken after being stained with different concentrations of Si-QAC CDs for 2 h under an excitation wavelength of 488 nm to determine the appropriate CD concentration for biofilm imaging. Scale bar: 20  $\mu\text{m}$ .

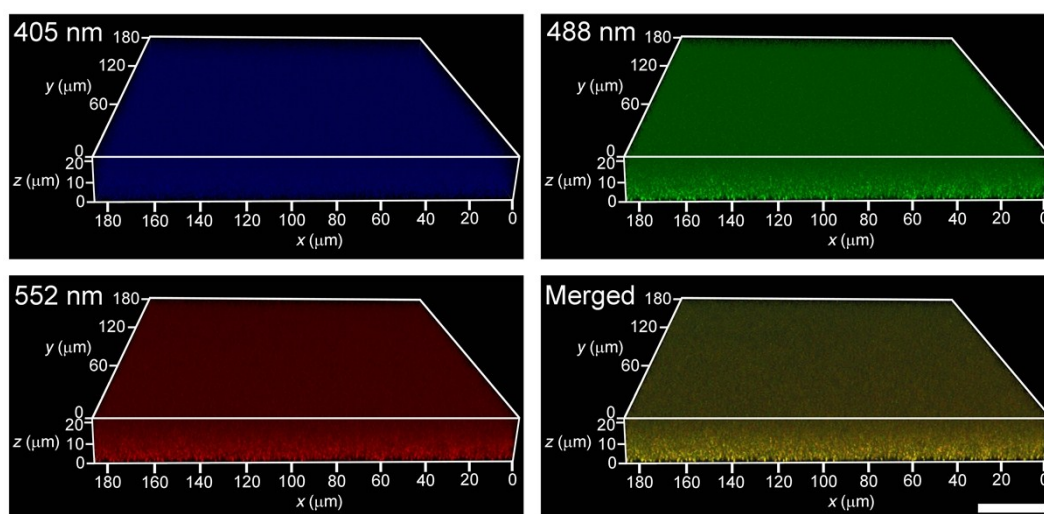

**Fig. S11** 3D confocal fluorescence images of an *E. coli* biofilm treated with Si-QAC CDs ( $50 \mu\text{g mL}^{-1}$ ) for 2 h at different excitation wavelengths (405, 488 and 552 nm). Scale bar: 30  $\mu\text{m}$ .

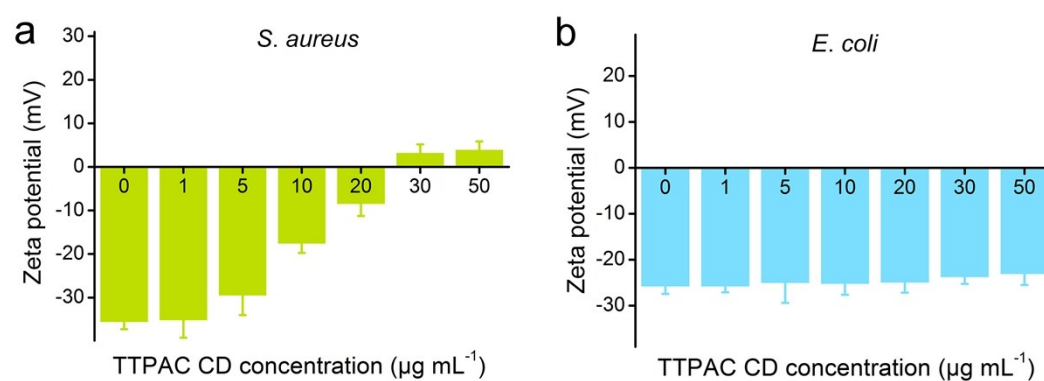

**Fig. S12** Zeta potentials of *S. aureus* (a) and *E. coli* (b) bacteria after incubation with different concentrations of TTPAC CDs ( $0\text{--}50 \mu\text{g mL}^{-1}$ ) for 2 h.

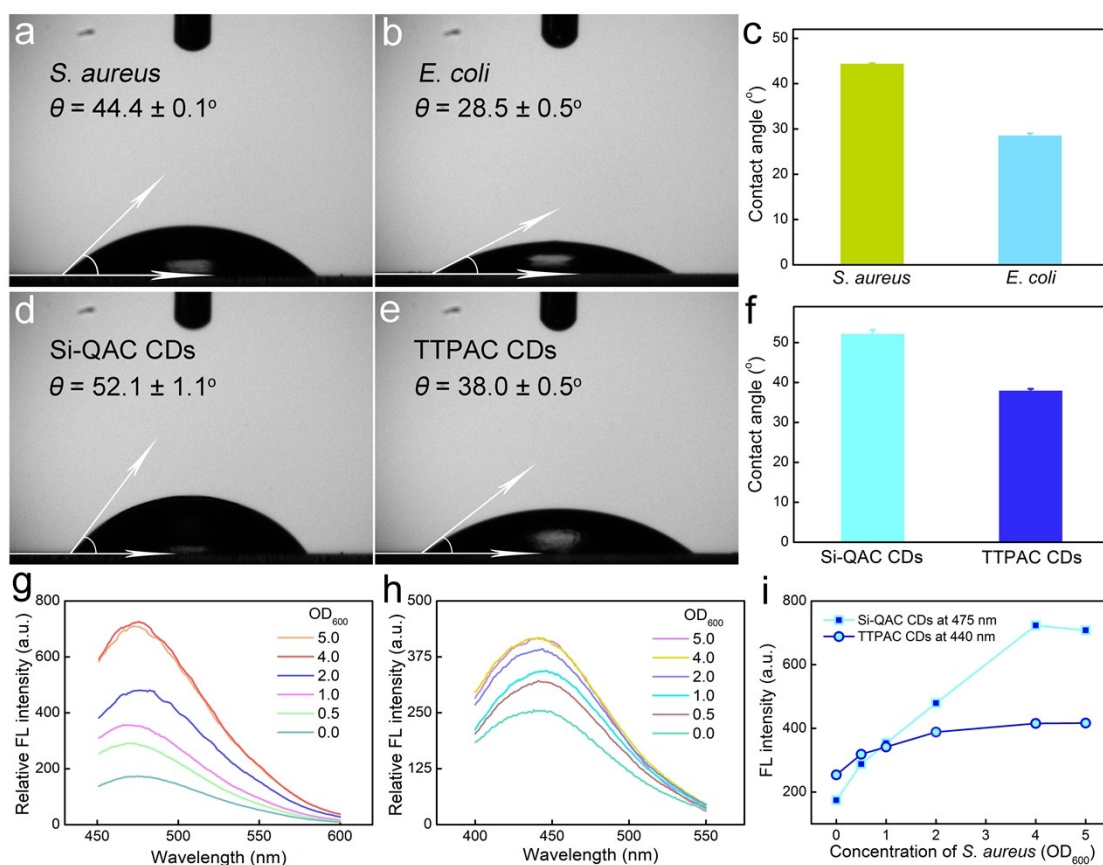

**Fig. S13** Photographs of a water droplet on a glass slide coated with an *S. aureus* bacterial layer (a) and a water droplet on a glass slide coated with an *E. coli* bacterial layer (b), and corresponding statistical histogram of the contact angles (c). Photographs of a water droplet on a glass slide coated with an Si-QAC CD layer (d) and a water droplet on a glass slide coated with a TTPAC CD layer (e), and corresponding statistical histogram of the contact angles (f). (g) FL spectra of Si-QAC CDs ( $6 \mu\text{g mL}^{-1}$ ) in the presence of different concentrations ( $\text{OD}_{600} = 0.0$ – $5.0$ ) of *S. aureus* bacteria. (h) FL spectra of TTPAC CDs ( $6 \mu\text{g mL}^{-1}$ ) in the presence of different concentrations ( $\text{OD}_{600} = 0.0$ – $5.0$ ) of *S. aureus* bacteria. (i) Corresponding statistical results of the FL intensities in (g) at 475 nm and in (h) at 440 nm, respectively.

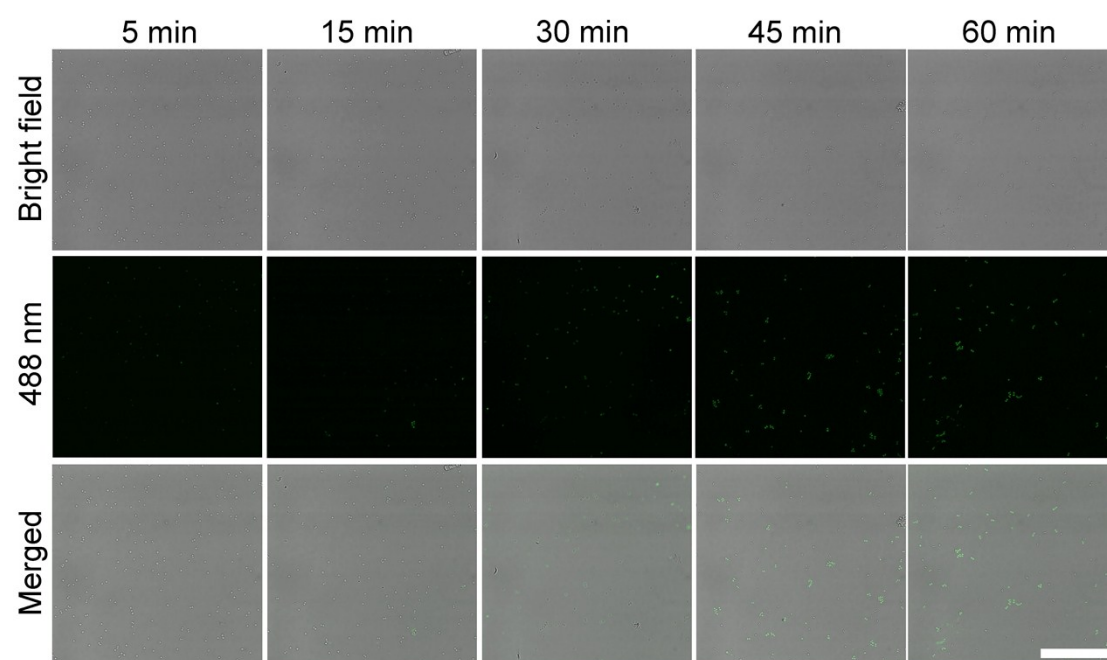

**Fig. S14** Confocal images of *S. aureus* bacteria after incubation with TTPAC CDs ( $20 \mu\text{g mL}^{-1}$ ) for different time periods. Scale bar:  $40 \mu\text{m}$ .
